# Supplementary material for: Controllable synthesis of 3D BiVO4 superstructures with visible-light-induced photocatalytic oxidation of NO in the gas phase and mechanistic analysis
Source: Royal Society of Chemistry journal article supplement (doi:10.1039/c5cp04730g), 2015-01-01
Supplement: c5cp04730g1.pdf [file c5cp04730g1.pdf]

## Supplementary Material

**Fig. S1** Schematic illustration of the crystal plane evolution of ms-BiVO<sub>4</sub>.

**Fig. S2** Variations of NO conversion efficiency with irradiation time for preliminary experiments with the absence of the ms-BiVO<sub>4</sub> sample (pH = 8), visible-light irradiation, the H<sub>2</sub>O<sub>2</sub> solution, both ms-BiVO<sub>4</sub> sample (pH = 8) and the H<sub>2</sub>O<sub>2</sub> solution, respectively.

**Fig. S3** The fitting line of standard solutions for Ion Chromatography.

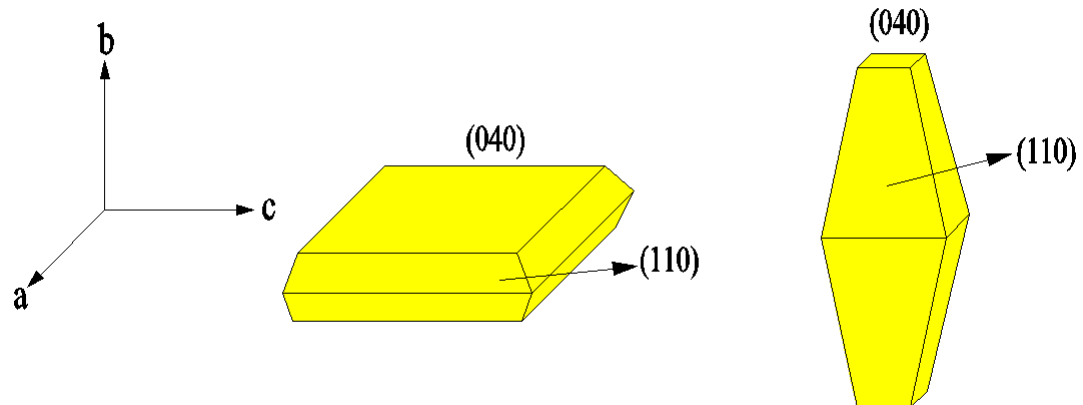

**Fig. S1** Schematic illustration of the crystal plane evolution of ms-BiVO<sub>4</sub>.

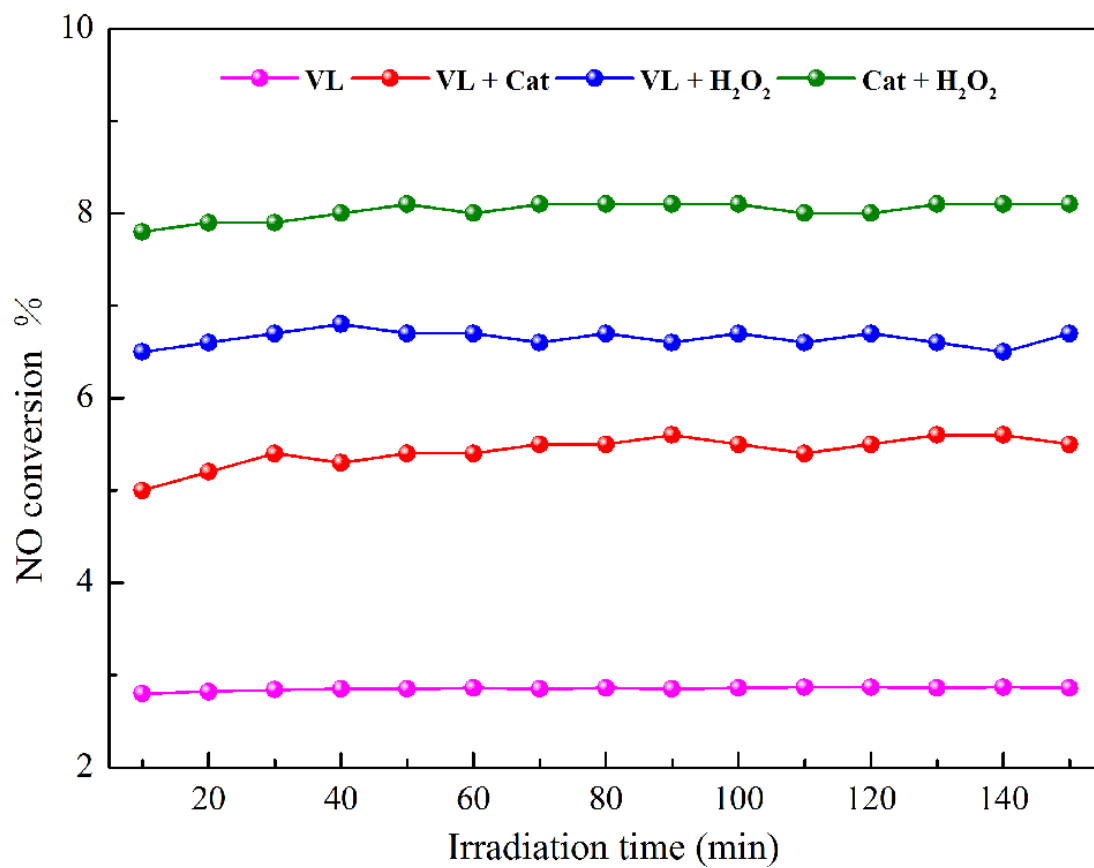

**Fig. S2** Variations of NO conversion efficiency with irradiation time for preliminary experiments with the absence of the ms-BiVO<sub>4</sub> sample (pH = 8), visible-light irradiation, the H<sub>2</sub>O<sub>2</sub> solution, both ms-BiVO<sub>4</sub> sample (pH = 8) and the H<sub>2</sub>O<sub>2</sub> solution, respectively.

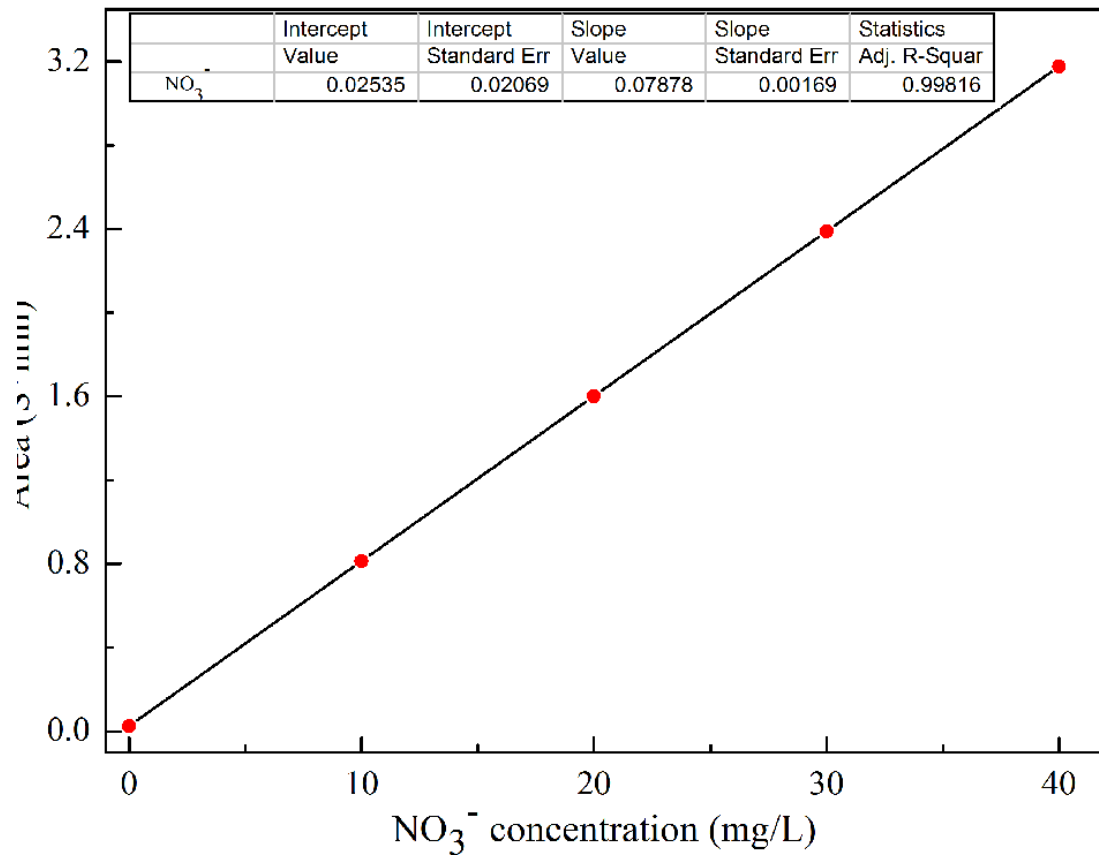

Fig. S3 The fitting line of standard solutions for Ion Chromatography.
